# Supplementary material for: FNDC5 expression closely correlates with muscle fiber types in porcine longissimus dorsi muscle and regulates myosin heavy chains (MyHCs) mRNA expression in C2C12 cells
Source: PeerJ. 2021 Apr 19;9:e11065. doi: 10.7717/peerj.11065 (PMC8061570; doi:10.7717/peerj.11065)
Supplement: Supplemental Information 1 — Each data point indicates the value from one pig. [file peerj-09-11065-s001.xlsx]

## Sheet: FNDC5 mRNA+MyHCmRNA compositiom
		FNDC5	MyHCI %	MyHCIIx%	MyHCIIa%	MyHCIIb%
DLY1	DLY1	0.75595	2.605	7.69434	3.6001	87.6039
DLY2	DLY2	0.917004	2.3926	7.6419	2.2105	87.325
DLY3	DLY3	0.917004	1.6101	6.9457	4.16701	87.9096
DLY4	DLY4	0.949342	2.7113	6.45504	2.0827	88.7657
DLY5	DLY5	1.04608	2.7464	6.0576	1.8983	89.3518
DLY6	DLY6	1.05336	1.43401	5.6447	3.4578	89.4816
DLY7	DLY7	1.10573	2.5769	5.965	1.543	90.4127
DLY8	DLY8	1.20164	2.0578	7.0029	1.0435	88.8651
LJH1	LJH1	3.18215	2.3488	7.6798	7.1915	82.6979
LJH2	LJH2	3.38698	2.7624	7.1965	6.6211	83.4094
LJH3	LJH3	3.27161	2.9999	6.5133	6.5048	83.0344
LJH4	LJH4	2.96905	3.1111	7.0535	7.1704	84.1287
LJH5	LJH5	4.08405	3.1562	6.5672	6.7665	83.5431
LJH6	LJH6	1.5801	2.7456	6.5987	7.5768	82.4592
LJH7	LJH7	3.605	2.9645	7.5196	7.347	83.5409
LJH8	LJH8	2.53081	2.8698	7.0198	7.0324	83.2646
