# Supplementary material for: FNDC5 expression closely correlates with muscle fiber types in porcine longissimus dorsi muscle and regulates myosin heavy chains (MyHCs) mRNA expression in C2C12 cells
Source: PeerJ. 2021 Apr 19;9:e11065. doi: 10.7717/peerj.11065 (PMC8061570; doi:10.7717/peerj.11065)
Supplement: Supplemental Information 2 — Each data point indicates the average performance of three repeats measures of cells [file peerj-09-11065-s002.xlsx]

## Sheet: FNDC5-RT PCR
	Blank		Mock		si-NC		FNDC5(-)(si-592)		vector-NC		FNDC5(+)
	GAPDH	FNDC5	GAPDH	FNDC5	GAPDH	FNDC5	GAPDH	FNDC5	GAPDH	FNDC5	GAPDH	FNDC5
Repeat1	18.05	27.97	18.08	28.02	16.59	26.59	17.96	29.69	18.11	28.01	18.15	20.78
Repeat2	18.15	28.3	18.05	28.02	16.7	26.58	17.8	29.78	17.98	28.05	18.19	20.94
Repeat3	18.02	28.1	18.16	27.99	16.67	26.65	17.82	29.63	17.89	27.92	18.09	20.95
Mean CT	18.0733	28.1233	18.0967	28.01	16.6533	26.6067	17.86	29.7	17.9933	27.9933	18.1433	20.89
Repeat1		9.87		9.92333		9.93667		11.83		10.0167		2.63667
Repeat2		10.2		9.92333		9.92667		11.92		10.0567		2.79667
Repeat3		10		9.89333		9.99667		11.77		9.92667		2.80667
Mean DCT		10.0233		9.91333		9.95333		11.84		10		2.74667
Repeat1		-0.153333		-0.1		-0.0866667		1.80667		-0.00666667		-7.38667
Repeat2		0.176667		-0.1		-0.0966667		1.89667		0.0333333		-7.22667
Repeat3		-0.0233333		-0.13		-0.0266667		1.74667		-0.0966667		-7.21667
Mean DDCT		5.92119e-16		-0.11		-0.07		1.81667		-0.0233333		-7.27667
Repeat1		1.11214		1.07177		1.06191		0.285851		1.00463		167.343
Repeat2		0.884745		1.07177		1.0693		0.268563		0.97716		149.776
Repeat3		1.0163		1.09429		1.01866		0.297989		1.0693		148.742
2-DDCT		1		1.07923		1.04972		0.283876		1.0163		155.058

## Sheet: FNDC5-WB
	mus FNDC5	Actin	mus FNDC5 /Actin		Rate to Blank
Blank repeat 1	62345.1	115157	0.541391		0.974356
Blank repeat 2	62938.3	110102	0.571635		1.02879
Blank repeat 3	62229.3	112349	0.553893	0.55564	0.996857
Mock repeat 1	56887.5	95503	0.595662		1.07203
Mock repeat 2	51147.4	93234.9	0.548587		0.987307
Mock repeat 3	61192.3	99321.3	0.616105	0.586784	1.10882
si-NC repeat 1	54651.9	88545.7	0.617217		1.11082
si-NC repeat 2	53343.3	89384.2	0.596786		1.07405
si-NC repeat 3	49094.2	90394.3	0.543112	0.585705	0.977453
FNDC5(-)(si592) repeat 1	10080.9	97520.9	0.103372		0.186042
FNDC5(-)(si592) repeat 2	11045.2	95382.3	0.115799		0.208406
FNDC5(-)(si592) repeat 3	17876.9	99029.3	0.180521	0.133231	0.324889
vector-NC repeat 1	56282	94527.6	0.595403		1.07156
vector-NC repeat 2	56243.3	90884.2	0.618845		1.11375
vector-NC repeat 3	52894.2	98364.3	0.537738	0.583995	0.967781
FNDC5(+) repeat 1	79682.5	93033.7	0.85649		1.54145
FNDC5(+) repeat 2	76345.2	92882.3	0.821956		1.4793
FNDC5(+) repeat 3	72876.8	99029.1	0.735913	0.804786	1.32444

## Sheet: FNDC5(-)-MyHC-RT PCR
	Blank					Mock					si-NC					FNDC5(-)(si592)
	GAPDH	MyHCI	MyHCIIa	MyHCIIx	MyHCIIb	GAPDH	MyHCI	MyHCIIa	MyHCIIx	MyHCIIb	GAPDH	MyHCI	MyHCIIa	MyHCIIx	MyHCIIb	GAPDH	MyHCI	MyHCIIa	MyHCIIx	MyHCIIb
Repeat1	18.05	27.21	24.53	30.99	28.98	18.08	27.22	24.21	30.41	29.38	16.59	25.71	22.56	29.5	27.52	17.96	27.21	27.25	30.7	28.95
Repeat2	18.15	27.4	24.46	30.7	29.14	18.05	27.18	24.44	30.83	29.01	16.7	25.93	23.28	29.52	27.66	17.8	27.1	26.76	30.76	28.87
Repeat3	18.02	27.19	24.47	30.95	29.1	18.16	27.19	24.08	30.84	29.33	16.67	25.25	22.7	29.4	27.5	17.82	27.26	27.18	30.73	28.8
Mean CT	18.0733	27.2667	24.4867	30.88	29.0733	18.0967	27.1967	24.2433	30.6933	29.24	16.6533	25.63	22.8467	29.4733	27.56	17.86	27.19	27.0633	30.73	28.8733
Repeat1		9.13667	6.45667	12.9167	10.9067		9.12333	6.11333	12.3133	11.2833		9.05667	5.90667	12.8467	10.8667		9.35	9.39	12.84	11.09
Repeat2		9.32667	6.38667	12.6267	11.0667		9.08333	6.34333	12.7333	10.9133		9.27667	6.62667	12.8667	11.0067		9.24	8.9	12.9	11.01
Repeat3		9.11667	6.39667	12.8767	11.0267		9.09333	5.98333	12.7433	11.2333		8.59667	6.04667	12.7467	10.8467		9.4	9.32	12.87	10.94
Mean DCT	—	9.19333	6.41333	12.8067	11		9.1	6.14667	12.5967	11.1433		8.97667	6.19333	12.82	10.9067		9.33	9.20333	12.87	11.0133
Repeat1		-0.0566667	0.0433333	0.11	-0.0933333		-0.07	-0.3	-0.493333	0.283333		-0.136667	-0.506667	0.04	-0.133333		0.156667	2.97667	0.0333333	0.09
Repeat2		0.133333	-0.0266667	-0.18	0.0666667		-0.11	-0.07	-0.0733333	-0.0866667		0.0833333	0.213333	0.06	0.00666667		0.0466667	2.48667	0.0933333	0.01
Repeat3		-0.0766667	-0.0166667	0.07	0.0266667		-0.1	-0.43	-0.0633333	0.233333		-0.596667	-0.366667	-0.06	-0.153333		0.206667	2.90667	0.0633333	-0.06
Mean DDCT	—	-5.92119e-16	-2.96059e-16	-5.92119e-16	0		-0.0933333	-0.266667	-0.21	0.143333		-0.216667	-0.22	0.0133333	-0.0933333		0.136667	2.79	0.0633333	0.0133333
Repeat1		1.04006	0.97041	0.926588	1.06683		1.04972	1.23114	1.40769	0.82169		1.09936	1.42076	0.972655	1.09682		0.897095	0.127038	0.97716	0.939523
Repeat2		0.911722	1.01866	1.13288	0.954842		1.07923	1.04972	1.05214	1.06191		0.943874	0.862542	0.959264	0.99539		0.968171	0.178418	0.937354	0.993092
Repeat3		1.05458	1.01162	0.952638	0.981686		1.07177	1.34723	1.04488	0.850667		1.51222	1.28937	1.04247	1.11214		0.866537	0.133354	0.95705	1.04247
2-DDCT		1	1	1	1		1.06683	1.20303	1.15669	0.905425		1.16205	1.16473	0.990801	1.06683		0.909618	0.144586	0.95705	0.990801

## Sheet: FNDC5(+)-MyHC-RT PCR
	Blank					Mock					vector-NC					FNDC5(+)
	GAPDH	MyHC I	MyHC IIa	MyHC IIx	MyHC IIb	GAPDH	MyHC I	MyHC IIa	MyHC IIx	MyHC IIb	GAPDH	MyHC I	MyHC IIa	MyHC IIx	MyHC IIb	GAPDH	MyHC I	MyHC IIa	MyHC IIx	MyHC IIb
Repeat1	16.95	22.2	27.02	28.21	26.02	17.11	22.34	27.73	28.25	26.02	18.11	23.23	28.18	29.11	26.98	18.26	23.61	26.28	29.34	27.18
Repeat2	16.92	22.25	27.19	27.89	25.78	17.13	22.25	27.42	28.17	25.99	17.98	23.23	28.11	29.23	26.98	18.17	23.83	26.21	29.49	27.4
Repeat3	16.92	22.22	27.01	28.14	25.99	16.99	22.32	27.38	28.08	26.24	17.89	23.14	28.15	28.98	26.85	18.38	23.43	26.19	29.26	27.26
Mean CT	16.93	22.2233	27.0733	28.08	25.93	17.0767	22.3033	27.51	28.1667	26.0833	17.9933	23.2	28.1467	29.1067	26.9367	18.27	23.6233	26.2267	29.3633	27.28
Repeat1		5.27	10.09	11.28	9.09		5.26333	10.6533	11.1733	8.94333		5.23667	10.1867	11.1167	8.98667		5.34	8.01	11.07	8.91
Repeat2		5.32	10.26	10.96	8.85		5.17333	10.3433	11.0933	8.91333		5.23667	10.1167	11.2367	8.98667		5.56	7.94	11.22	9.13
Repeat3		5.29	10.08	11.21	9.06		5.24333	10.3033	11.0033	9.16333		5.14667	10.1567	10.9867	8.85667		5.16	7.92	10.99	8.99
Mean DCT	—	5.29333	10.1433	11.15	9		5.22667	10.4333	11.09	9.00667		5.20667	10.1533	11.1133	8.94333		5.35333	7.95667	11.0933	9.01
Repeat1		-0.0233333	-0.0533333	0.13	0.09		-0.03	0.51	0.0233333	-0.0566667		-0.0566667	0.0433333	-0.0333333	-0.0133333		0.0466667	-2.13333	-0.08	-0.09
Repeat2		0.0266667	0.116667	-0.19	-0.15		-0.12	0.2	-0.0566667	-0.0866667		-0.0566667	-0.0266667	0.0866667	-0.0133333		0.266667	-2.20333	0.07	0.13
Repeat3		-0.00333333	-0.0633333	0.06	0.06		-0.05	0.16	-0.146667	0.163333		-0.146667	0.0133333	-0.163333	-0.143333		-0.133333	-2.22333	-0.16	-0.01
Mean DDCT	—	0	0	5.92119e-16	0		-0.0666667	0.29	-0.06	0.00666667		-0.0866667	0.01	-0.0366667	-0.0566667		0.06	-2.18667	-0.0566667	0.01
Repeat1		1.0163	1.03766	0.913831	0.939523		1.02101	0.702222	0.983957	1.04006		1.04006	0.97041	1.02337	1.00928		0.968171	4.3873	1.05702	1.06437
Repeat2		0.981686	0.922316	1.14076	1.10957		1.08673	0.870551	1.04006	1.06191		1.04006	1.01866	0.941696	1.00928		0.831238	4.60542	0.952638	0.913831
Repeat3		1.00231	1.04488	0.959264	0.959264		1.03526	0.895025	1.10701	0.89296		1.10701	0.990801	1.11987	1.10445		1.09682	4.66971	1.11729	1.00696
2-DDCT		1	1	1	1		1.04729	0.817902	1.04247	0.99539		1.06191	0.993092	1.02574	1.04006		0.959264	4.55252	1.04006	0.993092

## Sheet: ZLN50-PGC1a-FNDC5-MyHC-RT PCR
	ZLN50-0							ZLN50-5							ZLN50-10							ZLN50-10+si592
	GAPDH	PGC1α	FNDC5	MyHC I	MyHC IIa	MyHC IIx	MyHC IIb	GAPDH	PGC1α	FNDC5	MyHC I	MyHC IIa	MyHC IIx	MyHC IIb	GAPDH	PGC1α	FNDC5	MyHC I	MyHC IIa	MyHC IIx	MyHC IIb	GAPDH	PGC1α	FNDC5	MyHC I	MyHC IIa	MyHC IIx	MyHC IIb
Repeat1	16.35	24.99	30.9	22.04	25.35	27.67	26.12	16.95	22.69	29.45	21.04	23.45	27.56	25.82	16.95	22.39	29.25	20.46	23.13	27.55	25.91	16.05	22.09	32.25	20.34	24.03	27.75	25.82
Repeat2	16.38	24.55	31.28	22.45	25.45	27.68	25.89	16.88	22.75	30.28	21.45	23.35	27.63	26.09	16.88	22.15	29.28	20.55	23.15	27.41	25.94	16.08	22.19	32.28	20.45	24.05	27.41	26.5
Repeat3	16.38	24.85	31.13	22.36	25.68	27.55	26.14	16.88	22.85	29.55	21.36	23.28	27.65	25.84	16.88	22.25	29.25	20.53	23.17	27.61	25.85	16.08	22.05	31.95	20.23	24.17	27.61	26.09
Mean CT	16.37	24.7967	31.1033	22.2833	25.4933	27.6333	26.05	16.9033	22.7633	29.76	21.2833	23.36	27.6133	25.9167	16.9033	22.2633	29.26	20.5133	23.15	27.5233	25.9	16.07	22.11	32.16	20.34	24.0833	27.59	26.1367
Repeat1	—	8.62	14.53	5.67	8.98	11.3	9.75	—	6.32	13.08	4.67	7.08	11.19	9.45	—	6.02	12.88	4.09	6.76	11.18	9.54		5.72	15.88	3.97	7.66	11.38	9.45
Repeat2		8.18	14.91	6.08	9.08	11.31	9.52		6.38	13.91	5.08	6.98	11.26	9.72		5.78	12.91	4.18	6.78	11.04	9.57		5.82	15.91	4.08	7.68	11.04	10.13
Repeat3		8.48	14.76	5.99	9.31	11.18	9.77		6.48	13.18	4.99	6.91	11.28	9.47		5.88	12.88	4.16	6.8	11.24	9.48		5.68	15.58	3.86	7.8	11.24	9.72
Mean DCT		8.42667	14.7333	5.91333	9.12333	11.2633	9.68		6.39333	13.39	4.91333	6.99	11.2433	9.54667		5.89333	12.89	4.14333	6.78	11.1533	9.53		5.74	15.79	3.97	7.71333	11.22	9.76667
Repeat1		0.193333	-0.203333	-0.243333	-0.143333	0.0366667	0.07		-2.10667	-1.65333	-1.24333	-2.04333	-0.0733333	-0.23		-2.40667	-1.85333	-1.82333	-2.36333	-0.0833333	-0.14		-2.70667	1.14667	-1.94333	-1.46333	0.116667	-0.23
Repeat2		-0.246667	0.176667	0.166667	-0.0433333	0.0466667	-0.16		-2.04667	-0.823333	-0.833333	-2.14333	-0.00333333	0.04		-2.64667	-1.82333	-1.73333	-2.34333	-0.223333	-0.11		-2.60667	1.17667	-1.83333	-1.44333	-0.223333	0.45
Repeat3		0.0533333	0.0266667	0.0766667	0.186667	-0.0833333	0.09		-1.94667	-1.55333	-0.923333	-2.21333	0.0166667	-0.21		-2.54667	-1.85333	-1.75333	-2.32333	-0.0233333	-0.2		-2.74667	0.846667	-2.05333	-1.32333	-0.0233333	0.04
Mean DDCT		0	-5.92119e-16	2.96059e-16	-5.92119e-16	-5.92119e-16	0		-2.03333	-1.34333	-1	-2.13333	-0.02	-0.133333		-2.53333	-1.84333	-1.77	-2.34333	-0.11	-0.15		-2.68667	1.05667	-1.94333	-1.41	-0.0433333	0.0866667
Repeat1		0.874583	1.15136	1.18372	1.10445	0.974905	0.952638		4.30695	3.1456	2.36745	4.12197	1.05214	1.17283		5.30248	3.61334	3.53898	5.14558	1.05946	1.10191		6.52812	0.451668	3.84593	2.75745	0.922316	1.17283
Repeat2		1.18646	0.884745	0.890899	1.03049	0.968171	1.11729		4.1315	1.76949	1.7818	4.41782	1.00231	0.972655		6.26219	3.53898	3.32495	5.07474	1.16743	1.07923		6.09095	0.442372	3.56359	2.71948	1.16743	0.732043
Repeat3		0.963707	0.981686	0.948246	0.878633	1.05946	0.939523		3.85483	2.93494	1.89649	4.63746	0.988514	1.15669		5.84283	3.61334	3.37137	5.00487	1.0163	1.1487		6.71165	0.556068	4.15064	2.50244	1.0163	0.972655
2-DDCT	—	1	1	1	1	1	1		4.0935	2.53737	2	4.3873	1.01396	1.09682		5.78908	3.58838	3.41054	5.07474	1.07923	1.10957		6.43824	0.480742	3.84593	2.65737	1.03049	0.941696

## Sheet: Irisin-mRNA-RT PCR
	Irisin-0											Irisin-20											Irisin-200
	GAPDH	MyHC I	MyHC IIa	MyHC IIx	MyHC IIb	PGC-1α	FNDC5	IL15	VEGF	NRF1	TFAM	GAPDH	MyHC I	MyHC IIa	MyHC IIx	MyHC IIb	PGC-1α	FNDC5	IL15	VEGF	NRF1	TFAM	GAPDH	MyHC I	MyHC IIa	MyHC IIx	MyHC IIb	PGC-1α	FNDC5	IL15	VEGF	NRF1	TFAM
Repeat1	14.83	31.03	25.71	28.87	27.43	25.68	27.48	29.34	27.38	27.98	28.94	14.8	30.1	25.07	28.31	27.53	23.65	26.88	28.21	26.23	26.12	28.02	15.51	29.93	24.68	29.32	28.46	23.04	25.89	27.43	25.67	25.34	27.56
Repeat2	14.54	30.79	25.64	28.75	27.63	25.66	27.51	29.25	27.23	28.02	28.78	14.74	30.13	25	28.82	27.75	24.05	26.51	28.04	26.11	26.14	28.01	15.61	29.92	24.78	29.27	28.31	22.89	25.87	27.34	25.54	25.48	27.68
Repeat3	14.77	31.19	25.8	28.81	27.43	24.97	27.43	29.12	27.01	28.11	28.87	14.74	30.04	25.03	28.78	27.66	23.9	26.74	28	25.99	26.24	27.97	15.57	30.19	24.7	29.26	28.39	22.96	25.78	27.54	25.38	25.56	27.77
Mean CT	14.7133	31.0033	25.7167	28.81	27.4967	25.4367	27.4733	29.2367	27.2067	28.0367	28.8633	14.76	30.09	25.0333	28.6367	27.6467	23.8667	26.71	28.0833	26.11	26.1667	28	15.5633	30.0133	24.72	29.2833	28.3867	22.9633	25.8467	27.4367	25.53	25.46	27.67
Repeat1		16.3167	10.9967	14.1567	12.7167	10.9667	12.7667	14.6267	12.6667	13.2667	14.2267		15.34	10.31	13.55	12.77	8.93667	12.1667	13.4967	11.5167	11.4067	13.3067		14.3667	9.11667	13.7567	12.8967	8.32667	11.1767	12.7167	10.9567	10.6267	12.8467
Repeat2		16.0767	10.9267	14.0367	12.9167	10.9467	12.7967	14.5367	12.5167	13.3067	14.0667		15.37	10.24	14.06	12.99	9.33667	11.7967	13.3267	11.3967	11.4267	13.2967		14.3567	9.21667	13.7067	12.7467	8.17667	11.1567	12.6267	10.8267	10.7667	12.9667
Repeat3		16.4767	11.0867	14.0967	12.7167	10.2567	12.7167	14.4067	12.2967	13.3967	14.1567		15.28	10.27	14.02	12.9	9.18667	12.0267	13.2867	11.2767	11.5267	13.2567		14.6267	9.13667	13.6967	12.8267	8.24667	11.0667	12.8267	10.6667	10.8467	13.0567
Mean DCT	—	16.29	11.0033	14.0967	12.7833	10.7233	12.76	14.5233	12.4933	13.3233	14.15		15.33	10.2733	13.8767	12.8867	9.15333	11.9967	13.37	11.3967	11.4533	13.2867		14.45	9.15667	13.72	12.8233	8.25	11.1333	12.7233	10.8167	10.7467	12.9567
Repeat1		0.0266667	-0.00666667	0.06	-0.0666667	0.243333	0.00666667	0.103333	0.173333	-0.0566667	0.0766667		-0.95	-0.693333	-0.546667	-0.0133333	-1.78667	-0.593333	-1.02667	-0.976667	-1.91667	-0.843333		-1.92333	-1.88667	-0.34	0.113333	-2.39667	-1.58333	-1.80667	-1.53667	-2.69667	-1.30333
Repeat2		-0.213333	-0.0766667	-0.06	0.133333	0.223333	0.0366667	0.0133333	0.0233333	-0.045	-0.0833333		-0.92	-0.763333	-0.0366667	0.206667	-1.38667	-0.963333	-1.19667	-1.09667	-1.925	-0.853333		-1.93333	-1.78667	-0.39	-0.0366667	-2.54667	-1.60333	-1.89667	-1.66667	-2.585	-1.18333
Repeat3		0.186667	0.0833333	0	-0.0666667	-0.466667	-0.0433333	-0.116667	-0.196667	0	0.00666667		-1.01	-0.733333	-0.0766667	0.116667	-1.53667	-0.733333	-1.23667	-1.21667	-1.87	-0.893333		-1.66333	-1.86667	-0.4	0.0433333	-2.47667	-1.69333	-1.69667	-1.82667	-2.55	-1.09333
Mean DDCT	—	-1.18424e-15	-1.18424e-15	1.18424e-15	0	-1.18424e-15	1.18424e-15	5.92119e-16	0	-0.0338889	1.18424e-15		-0.96	-0.73	-0.22	0.103333	-1.57	-0.763333	-1.15333	-1.09667	-1.90389	-0.863333		-1.84	-1.84667	-0.376667	0.04	-2.47333	-1.62667	-1.8	-1.67667	-2.61056	-1.19333
Repeat1		0.981686	1.00463	0.959264	1.04729	0.844791	0.99539	0.93088	0.886791	1.04006	0.948246		1.93187	1.61702	1.46071	1.00928	3.45017	1.50873	2.03731	1.96791	3.7755	1.79419		3.79298	3.6978	1.26576	0.92445	5.26585	2.99661	3.49833	2.90123	6.48302	2.46798
Repeat2		1.15936	1.05458	1.04247	0.911722	0.856584	0.974905	0.990801	0.983957	1.03168	1.05946		1.89212	1.69741	1.02574	0.866537	2.61474	1.94981	2.29209	2.1386	3.79737	1.80667		3.81937	3.45017	1.31039	1.02574	5.84283	3.03845	3.72352	3.1748	6.00016	2.27101
Repeat3		0.878633	0.943874	1	1.04729	1.38191	1.03049	1.08423	1.14605	1	0.99539		2.01391	1.66248	1.05458	0.922316	2.90123	1.66248	2.35653	2.32409	3.65533	1.85746		3.16748	3.64689	1.31951	0.97041	5.5661	3.23403	3.24151	3.54717	5.85634	2.13366
2-DDCT	—	1	1	1	1	1	1	1	1	1.02377	1		1.94531	1.65864	1.16473	0.93088	2.96905	1.69741	2.22427	2.1386	3.74221	1.81924		3.5801	3.59668	1.29834	0.972655	5.55325	3.08799	3.4822	3.19688	6.10739	2.2868

## Sheet: Irisin -Enzymes
	Irisin-0				Irisin-20				Irisin-200
	LDH	SDH	MDH	CK	LDH	SDH	MDH	CK	LDH	SDH	MDH	CK
repeat1	2.565	18.45	2.01	26.78	1.865	27.89	4.23	30.12	1.76	30.23	6.23	37.46
repeat2	2.6	18.53	2.23	26.89	1.98	27.67	4.67	29.78	1.89	32.56	5.98	36.87
repeat3	2.41	18.25	2.53	27.13	1.89	29.99	3.98	28.98	1.97	33.12	6.56	38.23
4
5
