# Supplementary material for: FNDC5 expression closely correlates with muscle fiber types in porcine longissimus dorsi muscle and regulates myosin heavy chains (MyHCs) mRNA expression in C2C12 cells
Source: PeerJ. 2021 Apr 19;9:e11065. doi: 10.7717/peerj.11065 (PMC8061570; doi:10.7717/peerj.11065)
Supplement: Supplemental Information 5 — The instructions of MycAway™ -Color One-Step Mycoplasma Detection Kit and detection results. [file peerj-09-11065-s005.pdf]

# MycAway™ -Color One-Step Mycoplasma Detection Kit UNG Plus

## 一步法快速支原体检测试剂盒（防污染版）

### 产品信息

| 产品名称                                                       | 产品编号      | 规格    |
|------------------------------------------------------------|-----------|-------|
| MycAway™ -Color One-Step Mycoplasma Detection Kit UNG Plus | 40612ES25 | 25 T  |
| 一步法快速支原体检测试剂盒（防污染版）                                        | 40612ES60 | 100 T |

### 产品描述

MycAway™ -Color One-Step Mycoplasma Detection Kit UNG Plus（防气溶胶污染）是利用 Yeasen 独特的等温扩增技术，专门针对细胞培养液中支原体污染的快速检测产品。较以往支原体检测产品（货号：40611），本试剂盒中加入了 UDG 酶，以便去除含 dU 的 PCR 产物气溶胶污染，在极大程度上抑制假阳性反应，提高检测的准确度。而且加入的 UDG 酶在室温下起作用，且对温度敏感、易于灭活，不影响实验结果。

主要原理是若细胞培养物被支原体污染，支原体 DNA 的保守序列会被大量、快速地扩增，使反应液由蓝紫色变成天蓝色，结果肉眼可辨，无需电泳。

翊圣 MycAway™ -Color One-Step Mycoplasma Detection Kit UNG Plus（防气溶胶污染）可以检测多种支原体，包括细胞培养过程中常见的 8 种支原体。传统巢式 PCR 支原体法检测法易受细胞培养上清中抑制物的影响，产生假阴性结果；反应后需开盖电泳检测，增加污染导致的假阳性风险。一步法支原体检测试剂盒完全没有上述缺点，且其检测灵敏度、准确性远高于 PCR 法。

### 产品组分

| 组分编号    | 组分名称              | 产品编号/规格       |                |
|---------|-------------------|---------------|----------------|
|         |                   | 40612ES25/25T | 40612ES60/100T |
| 40611-A | MycAway™ -Color A | 600 µL        | 600 µL×4       |
| 40611-B | MycAway™ -Color B | 25 µL         | 25 µL×4        |
| 40611-C | Positive Control  | 10 µL         | 10 µL×4        |
| 40611-D | 矿物油               | 500 µL        | 500 µL×4       |

### 运输与保存方法

冰袋运输。

-20 °C 避光保存，保质期 18 个月。若较长时间不用，请注意避光保存。

### 注意事项

- 1) 使用本试剂前请仔细阅读说明书。
- 2) 整个实验，应规范操作，包括反应体系的配制、样本处理及加样。
- 3) 为了您的安全和健康，请穿实验服并戴一次性手套操作。

### 使用方法

#### 1. 支原体待检样本准备

**贴壁细胞：**直接吸取上清。建议在细胞传代或换液 3 天以上，且汇合度达到 90% 左右时取样，此时上清中支原体含量较高，便于检出。

**悬浮细胞：**500 g 离心 5 min 后，吸取上清。建议在细胞传代或换液 3 天以上时取样，此时支原体含量较高，便于检出。

## 2. 反应体系

将 MycAway™-Color 从-20 °C 取出, 溶解后颠倒混匀, 瞬时离心确保所有液体落到管底。根据待检测样品量, 配制如下体系 (通常实验需要设置阴性对照和阳性对照):

|                  | 单次反应体积 (μL) | 总体积 (μL)     |
|------------------|-------------|--------------|
| MycAway™-Color A | 24          | × 样品数 × 1.1* |
| MycAway™-Color B | 1           |              |

【\*】: 移液器存在误差, 配制时请多出 10% 为保证分装后每管的量。

## 3. 加样

**待测样品:** 向其余反应管中加入 1 μL 待测培养上清;

**阴性对照:** 第一支反应管中不加入任何样品, 作为阴性对照;

**阳性对照:** 向最后一个反应管中加入 1 μL Positive Control, 作为阳性对照。

【注】: 1) 如果反应是在水浴锅中进行, 则每管加入 20 μL 矿物油, 以防止液体蒸发导致结果的误差。如果反应是在 PCR 仪中进行, 不需要加矿物油。

2) 实验室中支原体污染十分常见, 鉴于本试剂盒反应灵敏, 建议用户在超净台中配制组分, 以免出现假阳性结果。

## 4. 反应条件

加完样后, 先将样品在 25~37 °C 放置 5 min, 再在水浴锅或 PCR 仪中, 恒温 63 °C 孵育 60 min。

【注】: 本试剂盒所用酶对温度非常敏感, 强烈建议使用 PCR 仪操作; 如用水浴锅, 应先加热使其达到规定温度后再反应。

温差超过 2 °C, 将导致扩增效率降低, 使阳性反应无法在说明书规定的时间内达到典型的天蓝色。

## 5. 结果判断

63 °C 反应 60 min 后, 立刻取出反应管, 放于室温。在光线良好的环境中观察反应结果 (建议以白纸为背景)。如果反应液仍为蓝紫色, 则判定为阴性; 若反应液为天蓝色, 则判定为阳性。

【注】: 在 63 °C 反应的时间必须准确计时, 超过说明书规定的反应时间可能会出现假阳性。反应管不可开盖, 否则会出现气空气中支原体污染反应, 出现假阳性的现象。

Baidu

翻译

官网

抗疫行动

翻译 API

同传

视频翻译

人工翻译

插件下载

APP下载

登录

检测到中文(简体)

英语

翻译

人工翻译

通用领域

生物医药

如果反应液仍为蓝紫色，则判定为阴性；若反应液为天蓝色，则判定为阳性。

如果反应液仍为蓝紫色，则判定为阴性；若反应液为天蓝色，则判定为阳性。  
If the reaction solution is still blue purple, it is negative; if the reaction solution is sky blue, it is positive.

双语对照

native: no mycoplasma
